# Supplementary material for: Immunosuppression for in vivo research: state-of-the-art protocols and experimental approaches
Source: PubMed Central journal article supplement — Cell Mol Immunol. 2016 Oct 10;14(2):146–79. doi: 10.1038/cmi.2016.39 (PMC5301156; doi:10.1038/cmi.2016.39), 2016-10-10
Supplement: cmi201639x2.pdf [file cmi201639x2.pdf]

Supplementary Table 2: Side effects of common immunosuppressant drugs

|                                     | human                                                                  | NHP                                                                                                                                                                                                                                                                                                                                                                                                                                                      | mouse                                                                                                                                                                                                                                        | rat                                                                                                                                                                                                                | dog                                                                                                                                                                                                                                                                     | pig                                                                                                                                                                                                                                                                                                                                             | sheep                                                                                                                                                                                                                                                                                                                                                                 |                                                                                                                                                                                                                                                                                                                                                                                                                                     |        |
|-------------------------------------|------------------------------------------------------------------------|----------------------------------------------------------------------------------------------------------------------------------------------------------------------------------------------------------------------------------------------------------------------------------------------------------------------------------------------------------------------------------------------------------------------------------------------------------|----------------------------------------------------------------------------------------------------------------------------------------------------------------------------------------------------------------------------------------------|--------------------------------------------------------------------------------------------------------------------------------------------------------------------------------------------------------------------|-------------------------------------------------------------------------------------------------------------------------------------------------------------------------------------------------------------------------------------------------------------------------|-------------------------------------------------------------------------------------------------------------------------------------------------------------------------------------------------------------------------------------------------------------------------------------------------------------------------------------------------|-----------------------------------------------------------------------------------------------------------------------------------------------------------------------------------------------------------------------------------------------------------------------------------------------------------------------------------------------------------------------|-------------------------------------------------------------------------------------------------------------------------------------------------------------------------------------------------------------------------------------------------------------------------------------------------------------------------------------------------------------------------------------------------------------------------------------|--------|
| Glucocorticoids (GCs)               | <b>Dexamethasone® (DM)</b>                                             | skin atrophy<br>disturbed wound healing<br>osteoporosis<br>muscle atrophy/myopathy<br>cataract, glaucoma<br>diabetes mellitus<br>adrenal insufficiency<br>"steroid psychosis" (at >40 mg P×d <sup>-1</sup> for 2 weeks)<br>hypertension<br>dyslipidemia<br>reduced fibrinolysis<br>peptic ulcers<br>gastrointestinal bleeding                                                                                                                            | n.s.i.                                                                                                                                                                                                                                       | 10% mortality after 21 days at a single dose of 87.5 mg×kg <sup>-1</sup> infections <sup>2</sup><br>osteoporosis <sup>3</sup>                                                                                      | hypertension (at 3 mg DM×kg <sup>-1</sup> ×d <sup>-1</sup> ) <sup>4</sup>                                                                                                                                                                                               | hypertension (at 0.5 mg DM×kg <sup>-1</sup> ×d <sup>-1</sup> ) <sup>4</sup>                                                                                                                                                                                                                                                                     | polydipsia / -uria<br>reversible rectal eversion<br>weight loss<br>lymphocytopenia<br>decreased albumin levels<br>weight loss in thymus and lymph nodes<br>neutrophilia<br>(at 2-6 mg DM×kg <sup>-1</sup> ×5×weekly for 5 weeks) <sup>5</sup>                                                                                                                         | hypertension after prenatal treatment with BM <sup>6</sup><br>fetal growth retardation after maternal administration of BM <sup>7</sup>                                                                                                                                                                                                                                                                                             |        |
|                                     | <b>Prednisolone® (P)</b>                                               | pancreatitis<br>oral candidiasis<br>infections <sup>1</sup>                                                                                                                                                                                                                                                                                                                                                                                              |                                                                                                                                                                                                                                              |                                                                                                                                                                                                                    |                                                                                                                                                                                                                                                                         |                                                                                                                                                                                                                                                                                                                                                 |                                                                                                                                                                                                                                                                                                                                                                       |                                                                                                                                                                                                                                                                                                                                                                                                                                     |        |
| Cytostatic drugs                    | <b>Azathioprine (Az)</b>                                               | myelosuppression:<br>anaemia, red blood cell aplasia,<br>thrombocytopenia, pancytopenia<br>carcinogenic<br>mutagenic<br>hypersensitive reactions<br>interstitial pneumonitis<br>gastrointestinal reactions <sup>8</sup>                                                                                                                                                                                                                                  | n.s.i.                                                                                                                                                                                                                                       | anemia<br>moribund<br>splenic T-cell lymphomas<br>weight loss <sup>9</sup>                                                                                                                                         | hepatotoxicity<br>decreased blood cell counts <sup>10</sup>                                                                                                                                                                                                             | cytopenia<br>hepatotoxicity <sup>11</sup><br>myelotoxicity <sup>12</sup>                                                                                                                                                                                                                                                                        | hepatotoxicity <sup>13</sup>                                                                                                                                                                                                                                                                                                                                          | n.s.i.                                                                                                                                                                                                                                                                                                                                                                                                                              |        |
|                                     | <b>Cyclophosphamide® (CY)</b>                                          | common:<br>mutagenic<br>carcinogenic<br>teratogenic <sup>14</sup><br>leucopenia (reversible)<br>bone marrow suppression<br>alopecia<br>nausea and vomiting (>50 mg CY×kg <sup>-1</sup> , 65-70% of patients)<br>hemorrhagic myocardial necrosis (50 mg CY×kg <sup>-1</sup> )<br>rare:<br>pneumonitis<br>fibrosis<br>chest deformity <sup>15</sup>                                                                                                        | rhesus monkey:<br>hematopoietic recovery after 200 mg×kg <sup>-1</sup><br>cardiac toxicity <sup>16</sup><br>cynomolgus monkey:<br>anemia <sup>17</sup>                                                                                       | alopecia <sup>18</sup><br>teratogen <sup>19</sup><br>mutagenic <sup>20</sup>                                                                                                                                       | mutagenic at 0.62 mg×kg <sup>-1</sup> 20<br>loss and malformation of offspring after pre- and postimplantation exposure <sup>21</sup><br>cardiotoxic <sup>22</sup><br>teratogenic <sup>23</sup>                                                                         | lethal at 100 mg×kg <sup>-1</sup><br>reversible pancytopenia<br>gastrointestinal toxicity <sup>16</sup>                                                                                                                                                                                                                                         | oral and gastrointestinal toxicity: oral mucositis, ulcers in the soft palate<br>bone marrow aplasia (at 60 mg×kg <sup>-1</sup> for 2 days)<br>lower spleen and intestinal weights<br>dehydration<br>sepsis<br>pneumonia<br>decreased blood iron levels <sup>24</sup><br>emesis <sup>25</sup>                                                                         | in an asbestosis model:<br>impaired lung function<br>decreased survival<br>increased susceptibility to bacterial pneumonia<br>enhanced fibrotic process in the lung <sup>26</sup>                                                                                                                                                                                                                                                   |        |
|                                     | <b>Methotrexate® (MTX)</b>                                             | minor myelotoxicity<br>nephrotoxicity<br>mucositis (20% of patients), nausea and vomiting<br>rare:<br>ocular irritation<br>erythema and desquamation<br>pleuritis<br>reversible oligospermia <sup>27</sup>                                                                                                                                                                                                                                               | cynomolgus monkey:<br>diarrhea<br>vomiting<br>anemia<br>leucopenia<br>thrombocytopenia <sup>28</sup>                                                                                                                                         | at 260 mg×kg <sup>-1</sup> :<br>decreased appetite and activity<br>hair loss<br>diarrhea<br>purulent, bloody stool<br>chills<br>weight loss<br>intestinal mucositis<br>66.7% mortality<br>leucopenia <sup>29</sup> | arthritis<br>nose bleeding<br>diarrhea<br>rapid body weight loss at 1.5 mg×kg <sup>-1</sup> every second day <sup>30</sup>                                                                                                                                              | delayed emesis <sup>31</sup><br>gastrointestinal irritation<br>ulcerative fibronectric enteritis<br>bloody diarrhea<br>hepatotoxicity <sup>32</sup>                                                                                                                                                                                             | diarrhea<br>vomiting<br>violent muscle fasciculation <sup>33</sup>                                                                                                                                                                                                                                                                                                    | negligible adverse effects after i.a. administration <sup>34</sup>                                                                                                                                                                                                                                                                                                                                                                  |        |
| <b>Mycophenolate mofetil® (MMF)</b> | gastrointestinal intolerance not associated with erosion <sup>35</sup> | mutagenic <sup>35</sup>                                                                                                                                                                                                                                                                                                                                                                                                                                  | none at 40 mg×kg <sup>-1</sup> ×d <sup>-1</sup> 36                                                                                                                                                                                           | none at 40 mg×kg <sup>-1</sup> ×d <sup>-1</sup> 36                                                                                                                                                                 | slight elevation of alkaline phosphatase level at 20 mg×kg <sup>-1</sup> ×d <sup>-1</sup><br>gastrointestinal symptoms at 40 mg×kg <sup>-1</sup> (dose related):<br>gastritis<br>diarrhea<br>anorexia                                                                   | combination therapy (Tcr, P, MMF):<br>gastric rupture<br>pneumonia<br>septic arthritis<br>toe abscess<br>diarrhea<br>decreased weight gain <sup>37</sup>                                                                                                                                                                                        | n.s.i.                                                                                                                                                                                                                                                                                                                                                                |                                                                                                                                                                                                                                                                                                                                                                                                                                     |        |
| Immunophilin drugs                  | <b>Ciclosporin A® (CsA)</b>                                            | multiorgan toxicity (at 1 and 5 mg×kg <sup>-1</sup> ×d <sup>-1</sup> p.o.)<br>infections<br>hepatotoxicity<br>interstitial pneumonia <sup>38</sup><br>hypertension<br>hypercholesterolaemia<br>nephrotoxicity<br>neurotoxicity<br>disturbances in glucose metabolism<br>hirsutism<br>gum hyperplasia<br>gingivitis<br>bilirubinaemia<br>gastrointestinal haemorrhage<br>cholestatic jaundice<br>hypomagnesaemia<br>thrombosis<br>gastritis <sup>39</sup> | cynomolgus monkey:<br>at 150 mg CsA×kg <sup>-1</sup> ×d <sup>-1</sup> p.o.:<br>pneumonia<br>15% diarrhea <sup>40</sup>                                                                                                                       | hepatotoxicity <sup>41</sup><br>at 30 mg CsA×kg <sup>-1</sup> ×d <sup>-1</sup> :<br>pancreatic islet injury <sup>42</sup><br>nephrotoxicity <sup>43</sup>                                                          | at 20 mg CsA×kg <sup>-1</sup> :<br>hypotension (unaltered at 10 mg CsA×kg <sup>-1</sup> ) <sup>44</sup><br>at 25-50 mg CsA×kg <sup>-1</sup> :<br>renal dysfunction (decreased renal inulin clearance, reduced filtration) <sup>45</sup><br>nephrotoxicity <sup>46</sup> | common (at 5 mg CsA×kg <sup>-1</sup> ×d <sup>-1</sup> ):<br>25% of the dogs showed vomiting<br>15% showed diarrhea/soft stool<br>rare:<br>decreased appetite/anorexia<br>infections<br>lethargy<br>nodules/cysts<br>papillomatosis<br>gingival hyperplasia<br>lymphadenopathy<br>reproductive disorders<br>neurological disorders <sup>47</sup> | infections (pneumonia, septic arthritis) at 40 mg×kg <sup>-1</sup> ×d <sup>-1</sup> 48                                                                                                                                                                                                                                                                                | no toxicity on organ or skin grafts (blood levels: 3 000-8 000 ng×mL <sup>-1</sup> )<br>reversible increased bilirubin level<br>decreased albumin level<br>renal tubulus necrosis <sup>49</sup><br>at 12 mg×kg <sup>-1</sup> ×d <sup>-1</sup> for 5 days (blood levels: 1 532-2 133 ng×mL <sup>-1</sup> ):<br>hypertension<br>increased heart rate<br>nephrotoxicity<br>anuria<br>slight reduction of potassium level <sup>50</sup> |        |
|                                     | <b>Tacrolimus® (Tcr)</b>                                               | hypertension<br>alopecia<br>pruritus<br>diarrhea<br>disturbances in glucose metabolism<br>neurotoxicity<br>tremor<br>hypomagnesaemia<br>thrombosis<br>gastritis<br>hirsutism<br>gum hyperplasia<br>gingivitis<br>bilirubinaemia<br>gastrointestinal haemorrhage<br>cholestatic jaundice <sup>39</sup><br>nephrotoxicity <sup>51</sup>                                                                                                                    | baboon:<br>at 0.3 mg Tcr×kg <sup>-1</sup> ×d <sup>-1</sup> :<br>heart/gastrointestinal toxicity (necrosis, arteritis, micromyocardial infarction) <sup>52</sup>                                                                              | nephrotoxicity <sup>53</sup>                                                                                                                                                                                       | at 4 mg Tcr×kg <sup>-1</sup> ×d <sup>-1</sup> p.o.:<br>inhibition of weight gain <sup>54</sup><br>nephrotoxicity<br>neurotoxicity <sup>55</sup>                                                                                                                         | at 0.2-5 mg Tcr×kg <sup>-1</sup> ×d <sup>-1</sup> :<br>heart/gastrointestinal toxicity (necrosis, arteritis, micromyocardial infarction)<br>hepatotoxicity<br>acinar cell degeneration in pancreas <sup>52</sup>                                                                                                                                | at 0.2-5 mg Tcr×kg <sup>-1</sup> ×d <sup>-1</sup> :<br>heart/gastrointestinal toxicity (necrosis, arteritis, micromyocardial infarction)<br>hepatotoxicity<br>acinar cell degeneration in pancreas <sup>52</sup>                                                                                                                                                      | nephrotoxicity <sup>51</sup><br>at 0.3 mg×kg <sup>-1</sup> ×d <sup>-1</sup> :<br>heart failure (necrosis smooth muscle cells in the coronary arteries, neutrophilic infiltrate in the myocardium)<br>pulmonary oedema<br>cyanosis<br>tachypnea<br>no nephrotoxicity <sup>56</sup>                                                                                                                                                   | n.s.i. |
|                                     | <b>Rapamycin® (Rpm)</b>                                                | pulmonary toxicity<br>anemia<br>leukopenia<br>thrombocytopenia<br>hyperlipidemia<br>posttransplantation diabetes<br>hypophosphatemia<br>lymphedema<br>hypertension<br>acne, folliculitis<br>stomatitis and mucous membrane disorders<br>edema<br>nail and hair pathologies<br>gonadal complications<br>surgical wound complication<br>infections<br>gastrointestinal complication <sup>57</sup>                                                          | cynomolgus monkey:<br>weight loss<br>diarrhea<br>lymphopenia<br>neutrophilia<br>no histologic abnormalities <sup>58</sup>                                                                                                                    | diabetes <sup>59</sup><br>elevated BUN levels<br>decreased body weight<br>low nephrotoxicity (intracytoplasmic vacuolization in proximal tubules) <sup>60</sup>                                                    | at 2 mg×kg <sup>-1</sup> ×d <sup>-1</sup> :<br>decreased food intake and concomitant weight loss<br>glucose intolerance<br>hyperinsulinaemic<br>hyperglycaemic <sup>62</sup>                                                                                            | sexual hormone dysfunction<br>seminiferous tubule dystrophy<br>reversible spermatogenesis blockade <sup>61</sup><br>at 2 mg×kg <sup>-1</sup> ×d <sup>-1</sup> :<br>decreased food intake and concomitant weight loss<br>glucose intolerance<br>hyperinsulinaemic<br>hyperglycaemic <sup>62</sup>                                                | pancreatitis<br>biliary duct occlusion <sup>63</sup><br>from a dose of 0.3 mg Rpm×kg <sup>-1</sup> ×week <sup>-1</sup> :<br>anorexia<br>diarrhea<br>bloody stool<br>decreased body weight (44% in 3 weeks)<br>increased serum amylase levels<br>mucosal necrosis and fibrinoid necrosis in the intestinal tract<br>vasculitis in heart, lung and spleen <sup>64</sup> | at 0.25-0.75 mg×kg <sup>-1</sup> ×d <sup>-1</sup> :<br>no gastrointestinal side effects<br>central congestions and ischemic necrosis in liver<br>pneumonia<br>decreased weight gain <sup>65</sup>                                                                                                                                                                                                                                   | n.s.i. |
| Cell therapy                        | <b>Regulatory T cells (T<sub>reg</sub>)</b>                            | possibility that Tregs convert into IL-17-producing proinflammatory cells<br>on-target toxicity<br>on-target hepatotoxicity<br>cytokine release syndrome<br>multi organ failure<br>central nervous system toxicity<br>lethal off-target toxicity by TCR cross-reactivity <sup>66</sup><br>tumor induction <sup>67</sup>                                                                                                                                  | n.s.i.                                                                                                                                                                                                                                       | no toxicity observed in xenogeneic GVHD model <sup>68</sup><br>lethal graft versus host disease-like phenotype by TCR mispairing <sup>69</sup><br>tumor induction <sup>67</sup>                                    | n.s.i.                                                                                                                                                                                                                                                                  | cytotoxicity<br>reversible skin erythema<br>reversible alterations in liver function:<br>AST >600 U×L <sup>-1</sup><br>AP >700 U×L <sup>-1</sup><br>increased bilirubin level <sup>70</sup>                                                                                                                                                     | n.s.i.                                                                                                                                                                                                                                                                                                                                                                | n.s.i.                                                                                                                                                                                                                                                                                                                                                                                                                              |        |
|                                     | <b>Mesenchymal stem cells (MSCs)</b>                                   | n.s.i.                                                                                                                                                                                                                                                                                                                                                                                                                                                   | n.s.i.                                                                                                                                                                                                                                       | see rat                                                                                                                                                                                                            | clotting of pulmonary/cerebral vessels after intravenous/intracarotid injection <sup>71</sup>                                                                                                                                                                           | potential pulmonary complications after intravenous delivery <sup>71</sup>                                                                                                                                                                                                                                                                      | n.s.i.                                                                                                                                                                                                                                                                                                                                                                | n.s.i.                                                                                                                                                                                                                                                                                                                                                                                                                              |        |
| Antibodies                          | <b>Anti-lymphocyte globulin® (ALG)</b>                                 | common:<br>fever<br>chills<br>leucopenia<br>thrombocytopenia<br>dermatologic manifestations (rashes, urticaria, pruritus, wheal, flare)<br>rare (<5% patients):<br>cardiovascular reactions (myocarditis, "cardiac irregularity", chest pain, hyper- and hypotension, tachy- and bradycardia) <sup>72</sup>                                                                                                                                              | cynomolgus monkeys:<br>no detectable acute or chronic toxic effects <sup>73</sup>                                                                                                                                                            | bone marrow toxicity:<br>50% decrease in colony-forming unit 24 hr after 1 mL i.v. ALG <sup>74</sup>                                                                                                               | lymphopenia <sup>75</sup><br>nephritis <sup>76</sup>                                                                                                                                                                                                                    | n.s.i.                                                                                                                                                                                                                                                                                                                                          | n.s.i.                                                                                                                                                                                                                                                                                                                                                                | n.s.i.                                                                                                                                                                                                                                                                                                                                                                                                                              |        |
|                                     | <b>Anti-thymocyte globulin® (ATG)</b>                                  | increased incidence of fever<br>hematologic abnormalities<br>cytomegalovirus infections<br>increased incidence of posttransplant lymphoproliferative disease <sup>77</sup><br>infectious complications<br>increased risk of malignancy after organ transplantation<br>decreased lymphocyte, erythrocyte, platelet and reticulocyte count <sup>78</sup>                                                                                                   | marked depletion of paracortical lymphocytes in spleen and mesenteric lymph nodes<br>moderate thrombocytopenia<br>decrease in peripheral lymphocyte count <sup>79</sup>                                                                      | n.s.i.                                                                                                                                                                                                             | n.s.i.                                                                                                                                                                                                                                                                  | leucopenia<br>lymphopenia<br>thrombocytopenia<br>increased serum alanine aminotransferase activity<br>no histologic changes <sup>80</sup>                                                                                                                                                                                                       | n.s.i.                                                                                                                                                                                                                                                                                                                                                                | n.s.i.                                                                                                                                                                                                                                                                                                                                                                                                                              |        |
|                                     | <b>Rituximab® (RTB)</b>                                                | acute allergic reactions<br>infusion reactions (in >25% of patients)<br>tumor lysis syndrome<br>mucocutaneous reactions<br>progressive multifocal leukoencephalopathy<br>neutropenia<br>slow recovery of B cells<br>infections<br>reactivation of hepatitis<br>intestinal perforation<br>interstitial pneumonia <sup>81</sup>                                                                                                                            | cynomolgus monkey:<br>no adverse effects at 16.8 mg×kg <sup>-1</sup> 82<br>at single dose of 100 mg×kg <sup>-1</sup> and multiple dose of 20 mg×kg <sup>-1</sup> ×week <sup>-1</sup> :<br>B cell depletion<br>lymphoid atrophy <sup>81</sup> | n.s.i.                                                                                                                                                                                                             | none at 375 mg per m <sup>2</sup> 83                                                                                                                                                                                                                                    | n.s.i.                                                                                                                                                                                                                                                                                                                                          | n.s.i.                                                                                                                                                                                                                                                                                                                                                                | n.s.i.                                                                                                                                                                                                                                                                                                                                                                                                                              | n.s.i. |
|                                     | <b>CAMPAT H-1H® (CHH)</b>                                              | cytopenia<br>infusion reactions (cytokine release syndrome)<br>infections (bacterial, viral, fungal, protozoan infections)<br>reactivation of latent cytomegalovirus and herpes zoster infections <sup>81</sup>                                                                                                                                                                                                                                          | cynomolgus monkey:<br>at 1 mg×kg <sup>-1</sup> :<br>reversible lymphopenia<br>neutropenia<br>hypotension<br>fever<br>immunogenic effects <sup>81</sup>                                                                                       | in human-CD52 transgenic mice:<br>transient increase in serum cytokines<br>depletion of peripheral blood lymphocytes <sup>81</sup>                                                                                 | n.s.i.                                                                                                                                                                                                                                                                  | n.s.i.                                                                                                                                                                                                                                                                                                                                          | n.s.i.                                                                                                                                                                                                                                                                                                                                                                | n.s.i.                                                                                                                                                                                                                                                                                                                                                                                                                              | n.s.i. |

AP = alkaline phosphatase, AST = aspartate aminotransferase, BM = betamethasone, BUN = blood urea nitrogen, DM = dexamethasone, IL-2 = interleukin 2, n.s.i. = no standardized information available, TCR = T cell receptor,

## References

- Schäcke H, Döcke WD, Asadullah K. Mechanisms involved in the side effects of glucocorticoids. *Pharmacol Ther* 2002; **96**: 23–43.
- Tonelli G. Acute toxicity of corticoids in the mouse. *Steroids* 1966; **8**: 857–63.
- Kim H, Zhao H, Kitaura H, Bhattacharyya S, Brewer JA, Muglia LJ et al. Glucocorticoids and the osteoclast. *Ann N Y Acad Sci* 2007; **1116**: 335–9.
- Saruta T. Mechanism of glucocorticoid-induced hypertension. *Hypertens Res* 1996; **19**: 1–8.
- Brownlie SE, Campbell JG, Head KW, Imlah P, McTaggart HS, McVie JG. The effects of prednisolone on normal pigs. *Eur J Cancer* 1978; **14**: 567–78.
- Dodic M, Peers A, Coghlan JP, May CN, Lumbers E, Yu Z et al. Altered cardiovascular haemodynamics and baroreceptor-heart rate reflex in adult sheep after prenatal exposure to dexamethasone. *Clin Sci* 1999; **97**: 103–9.
- Newnham JP, Evans SF, Godfrey M, Huang W, Ikegami M, Jobe A. Maternal, but not fetal, administration of corticosteroids restricts fetal growth. *J Matern Fetal Med* 1999; **8**: 81–7.
- Anstey A, Lear JT. Azathioprine: clinical pharmacology and current indications in autoimmune disorders. *BioDrugs* 1998; **9**: 33–47.
- Wielenga, Mattheus C B, van Lidth de Jeude, Jooske F, Rosekrans SL, Levin AD, Schukking M, D'Haens, Geert R A M et al. Azathioprine does not reduce adenoma formation in a mouse model of sporadic intestinal tumorigenesis. *World J Gastroenterol* 2014; **20**: 16683–9.
- Ahmed, Walaa M S, Khalaf AA, Moselhy WA, Safwat GM. Royal jelly attenuates azathioprine induced toxicity in rats. *Environ Toxicol Pharmacol* 2014; **37**: 431–7.
- Wallisch K, Trepanier LA. Incidence, timing, and risk factors of azathioprine hepatotoxicosis in dogs. *J Vet Intern Med* 2015; **29**: 513–8.
- Rodriguez DB, Mackin A, Easley R, Boyle CR, Hou W, Langston C et al. Relationship between red blood cell thiopurine methyltransferase activity and myelotoxicity in dogs receiving azathioprine. *J Vet Intern Med* 2004; **18**: 339–45.
- Perings E, Schumann E, Holtz W, Smidt D, Seidenkranz HG. Untersuchungen über mögliche hepatotoxische Nebenwirkungen von Azathioprin beim Göttinger Miniaturschwein. *DTW Dtsch Tierarztl Wochenschr* 1975; **82**: 452–5.
- Mohn GR, Ellenberger J. Genetic effects of cyclophosphamide, ifosfamide and trofosfamide. *Mutation research* 1976; **32**: 331–60.
- Ahmed AR, Hombal SM. Cyclophosphamide (Cytosan). A review on relevant pharmacology and clinical uses. *J Am Acad Dermatol* 1984; **11**: 1115–26.
- Thomas ED. High-dose therapy and bone marrow transplantation. *Semin Oncol* 1985; **12**: 15–20.
- Lam TT, Hausen B, Squiers E, Cozzi E, Morris RE. Cyclophosphamide-induced postoperative anemia in cynomolgus monkey recipients of hDAF-transgenic pig organ xenografts. *Transplant Proc* 2002; **34**: 1451–2.
- Hendrix S, Handjiski B, Peters, Eva M J, Paus R. A guide to assessing damage response pathways of the hair follicle: lessons from cyclophosphamide-induced alopecia in mice. *J Invest Dermatol* 2005; **125**: 42–51.
- Torchinsky A, Fein A, Toder V. Immunoteratology: I. MHC involvement in the embryo response to teratogens in mice. *Am J Reprod Immunol* 1995; **34**: 288–98.
- McCarroll N, Keshava N, Cimino M, Chu M, Dearfield K, Keshava C et al. An evaluation of the mode of action framework for mutagenic carcinogens case study: Cyclophosphamide. *Environ Mol Mutagen* 2008; **49**: 117–31.
- Hales BF, Barton TS, Robaire B. Impact of paternal exposure to chemotherapy on offspring in the rat. *J Natl Cancer Inst Monographs* 2005; 28–31.
- Forni M de, Armand JP. Cardiotoxicity of chemotherapy. *Curr Opin Oncol* 1994; **6**: 340–4.
- Fritz H, Giese K. Evaluation of the teratogenic potential of chemicals in the rat. *Pharmacology* 1990; **40 Suppl 1**: 1–27.
- Pontoppidan PL, Shen RL, Petersen BL, Thyman T, Heilmann C, Müller K et al. Intestinal response to myeloablative chemotherapy in piglets. *Exp Biol Med (Maywood)* 2014; **239**: 94–104.
- Szelenyi I, Herold H, Göthert M. Emesis induced in domestic pigs: a new experimental tool for detection of antiemetic drugs and for evaluation of emetogenic potential of new anticancer agents. *J Pharmacol Toxicol Methods* 1994; **32**: 109–16.
- Bégin R, Cantin A, Massé S, Côté Y, Fabi D. Effects of cyclophosphamide treatment in experimental asbestosis. *Exp Lung Res* 1988; **14**: 823–36.
- Jolivet J, Cowan KH, Curt GA, Clendeninn NJ, Chabner BA. The pharmacology and clinical use of methotrexate. *N Engl J Med* 1983; **309**: 1094–104.
- Cozzi E, Cadrobbi R, Baldan N, Dedja A, Calabrese F, Castagnaro M et al. Methotrexate for immunosuppression in life-supporting pig-to-cynomolgus monkey renal xenotransplantation. *Xenotransplantation* 2003; **10**: 587–95.
- Chen C, Tian L, Zhang M, Sun Q, Zhang X, Li X et al. Protective effect of amifostine on high-dose methotrexate-induced small intestinal mucositis in mice. *Dig Dis Sci* 2013; **58**: 3134–43.

- 30 Liu D, Lon H, Wang Y, DuBois DC, Almon RR, Jusko WJ. Pharmacokinetics, pharmacodynamics and toxicities of methotrexate in healthy and collagen-induced arthritic rats. *Biopharm Drug Dispos* 2013; **34**: 203–14.
- 31 Yamakuni H, Sawai H, Maeda Y, Imazumi K, Sakuma H, Matsuo M et al. Probable involvement of the 5-hydroxytryptamine(4) receptor in methotrexate-induced delayed emesis in dogs. *J Pharmacol Exp Ther* 2000; **292**: 1002–7.
- 32 Fukui H, Yamamoto M. Methotrexate produces delayed emesis in dogs: a potential model of delayed emesis induced by chemotherapy. *Eur J Pharmacol* 1999; **372**: 261–7.
- 33 Prémaud A. An Animal Model for the Study of Chronopharmacokinetics of Drugs and Application to Methotrexate and Vinorelbine. *Toxicol Appl Pharmacol* 2002; **183**: 189–97.
- 34 Harker GJ, Stephens FO, Wass J, Zbroja RA, Chick BF, Grace J. A preliminary report on the suitability of sheep epidermal squamous cell carcinoma as a solid tumor model in the evaluation of intra-arterial methotrexate administration. *J Surg Oncol* 1986; **32**: 65–72.
- 35 Allison AC, Eugui EM. Immunosuppressive and other effects of mycophenolic acid and an ester prodrug, mycophenolate mofetil. *Immunol Rev* 1993; **136**: 5–28.
- 36 Morris RE, Hoyt EG, Murphy MP, Eugui EM, Allison AC. Mycophenolic acid morpholinoethylester (RS-61443) is a new immunosuppressant that prevents and halts heart allograft rejection by selective inhibition of T- and B-cell purine synthesis. *Transplant Proc* 1990; **22**: 1659–62.
- 37 Jones JW, Ustüner ET, Zdichavsky M, Edelstein J, Ren X, Maldonado C et al. Long-term survival of an extremity composite tissue allograft with FK506-mycophenolate mofetil therapy. *Surgery* 1999; **126**: 384–8.
- 38 Bacigalupo A, Van Lint MT, Occhini D, Gualandi F, Lamparelli T, Sogno G et al. Increased risk of leukemia relapse with high-dose cyclosporine A after allogeneic marrow transplantation for acute leukemia. *Blood* 1991; **77**: 1423–8.
- 39 Scott LJ, McKeage K, Keam SJ, Plosker GL. Tacrolimus: a further update of its use in the management of organ transplantation. *Drugs* 2003; **63**: 1247–97.
- 40 Hausen B, Ikonen T, Briffa N, Berry GJ, Christians U, Robbins RC et al. Combined immunosuppression with cyclosporine (neoral) and SDZ RAD in non-human primate lung transplantation: systematic pharmacokinetic-based trials to improve efficacy and tolerability. *Transplantation* 2000; **69**: 76–86.
- 41 Van den Hof, Wim F P M, van Summeren A, Lommen A, Coonen, Maarten L J, Brauers K, van Herwijnen M et al. Integrative cross-omics analysis in primary mouse hepatocytes unravels mechanisms of cyclosporin A-induced hepatotoxicity. *Toxicology* 2014; **324**: 18–26.
- 42 Lim SW, Doh KC, Jin L, Piao SG, Heo SB, Zheng YF et al. Oral administration of ginseng ameliorates cyclosporine-induced pancreatic injury in an experimental mouse model. *PLoS ONE* 2013; **8**: e72685.
- 43 Piao SG, Kang SH, Lim SW, Chung BH, Doh KC, Heo SB et al. Influence of N-acetylcysteine on Klotho expression and its signaling pathway in experimental model of chronic cyclosporine nephropathy in mice. *Transplantation* 2013; **96**: 146–53.
- 44 Murray BM, Paller MS, Ferris TF. Effect of cyclosporine administration on renal hemodynamics in conscious rats. *Kidney Int* 1985; **28**: 767–74.
- 45 Kawaguchi A, Sugimoto K, Fujimura A. Preventive effect of platelet-activating factor antagonist, Y-24180, against cyclosporine-induced acute nephrotoxicity. *Life Sci* 2001; **68**: 1181–90.
- 46 Bobadilla NA, Gamba G, Tapia E, García-Torres R, Bolio A, López-Zetina P et al. Role of NO in cyclosporin nephrotoxicity: effects of chronic NO inhibition and NO synthases gene expression. *Am J Physiol* 1998; **274**: F791-8.
- 47 Steffan J, Favrot C, Mueller R. A systematic review and meta-analysis of the efficacy and safety of cyclosporin for the treatment of atopic dermatitis in dogs. *Vet Dermatol* 2006; **17**: 3–16.
- 48 Ustüner ET, Zdichavsky M, Ren X, Edelstein J, Maldonado C, Ray M et al. Long-term composite tissue allograft survival in a porcine model with cyclosporine/mycophenolate mofetil therapy. *Transplantation* 1998; **66**: 1581–7.
- 49 Rose AH, Ilett KF, O'Donoghue HL, Hackett LP, Penhale WJ, Manning LS et al. Cyclosporin immunosuppression of sheep: pharmacokinetics and allograft survival. *Vet Immunol Immunopathol* 2001; **81**: 23–36.
- 50 Whitworth JA, Mills EH, Coghlan JP, McDougall JG, Nelson MA, Spence CD et al. The haemodynamic effects of cyclosporin A in sheep. *Clin Exp Pharmacol Physiol* 1987; **14**: 573–80.
- 51 Espí A, Regueira FM, Toledo G, Díez-Caballero A, Baixaulí J, Hernández JL et al. Influence of hepatic ischemia-reperfusion injury on tacrolimus acute renal toxicity in pigs. *Transplant Proc* 2002; **34**: 3053–6.
- 52 Todo S, Ueda Y, Demetris JA, Inventarza O, Nalesnik M, Venkataramanan R et al. Immunosuppression of canine, monkey, and baboon allografts by FK 506: with special reference to synergism with other drugs and to tolerance induction. *Surgery* 1988; **104**: 239–49.
- 53 Dumont FJ, Staruch MJ, Koprak SL, Siekierka JJ, Lin CS, Harrison R et al. The immunosuppressive and toxic effects of FK-506 are mechanistically related: pharmacology of a novel antagonist of FK-506 and rapamycin. *J Exp Med* 1992; **176**: 751–60.

- 54 Uchida H, Kobayashi E, Ogino Y, Mizuta K, To H, Okabe R et al. Chronopharmacology of tacrolimus in rats: toxicity and efficacy in a mouse-to-rat intestinal transplant model and its pharmacokinetic profile. *Transplant Proc* 1999; **31**: 2751–3.
- 55 Yamauchi A, Oishi R, Kataoka Y. Tacrolimus-induced neurotoxicity and nephrotoxicity is ameliorated by administration in the dark phase in rats. *Cell Mol Neurobiol* 2004; **24**: 695–704.
- 56 Utsugi R, Barth RN, Lee RS, Kitamura H, LaMattina JC, Ambroz J et al. Induction of transplantation tolerance with a short course of tacrolimus (FK506): I. Rapid and stable tolerance to two-haplotype fully mhc-mismatched kidney allografts in miniature swine. *Transplantation* 2001; **71**: 1368–79.
- 57 Zaza G, Tomei P, Ria P, Granata S, Boschiero L, Lupo A. Systemic and nonrenal adverse effects occurring in renal transplant patients treated with mTOR inhibitors. *Clin Dev Immunol* 2013; **2013**: 403280.
- 58 Schuurman HJ, Ringers J, Schuler W, Slingerland W, Jonker M. Oral efficacy of the macrolide immunosuppressant SDZ RAD and of cyclosporine microemulsion in cynomolgus monkey kidney allotransplantation. *Transplantation* 2000; **69**: 737–42.
- 59 Schindler CE, Partap U, Patchen BK, Swoap SJ. Chronic rapamycin treatment causes diabetes in male mice. *Am J Physiol Regul Integr Comp Physiol* 2014; **307**: R434–43.
- 60 Di Joseph, J F, Sehgal SN. Functional and histopathologic effects of rapamycin on mouse kidney. *Immunopharmacol Immunotoxicol* 1993; **15**: 45–56.
- 61 Rovira J, Diekmann F, Ramírez-Bajo MJ, Bañón-Maneus E, Moya-Rull D, Campistol JM. Sirolimus-associated testicular toxicity: detrimental but reversible. *Transplantation* 2012; **93**: 874–9.
- 62 Deblon N, Bourgoin L, Veyrat-Durebex C, Peyrou M, Vinciguerra M, Caillon A et al. Chronic mTOR inhibition by rapamycin induces muscle insulin resistance despite weight loss in rats. *Br J Pharmacol* 2012; **165**: 2325–40.
- 63 Hartner WC, Van Der Werf, W J, Lodge JP, Gilchrist B, De Fazio, S R, Markees TG et al. Effect of rapamycin on renal allograft survival in canine recipients treated with antilymphocyte serum, donor bone marrow, and cyclosporine. *Transplantation* 1995; **60**: 1347–50.
- 64 Ochiai T, Gunji Y, Nagata M, Komori A, Asano T, Isono K. Effects of rapamycin in experimental organ allografting. *Transplantation* 1993; **56**: 15–9.
- 65 Almond PS, Moss A, Nakhleh RE, Melin M, Chen S, Salazar A et al. Rapamycin: immunosuppression, hyporesponsiveness, and side effects in a porcine renal allograft model. *Transplantation* 1993; **56**: 275–81.
- 66 Jethwa H, Adami AA, Maher J. Use of gene-modified regulatory T-cells to control autoimmune and alloimmune pathology: is now the right time? *Clin Immunol* 2014; **150**: 51–63.
- 67 Colombo MP, Piconese S. Regulatory-T-cell inhibition versus depletion: the right choice in cancer immunotherapy. *Nat Rev Cancer* 2007; **7**: 880–7.
- 68 Hannon M, Lechanteur C, Lucas S, Somja J, Seidel L, Belle L et al. Infusion of clinical-grade enriched regulatory T cells delays experimental xenogeneic graft-versus-host disease. *Transfusion* 2014; **54**: 353–63.
- 69 Bendle GM, Linnemann C, Hooijkaas AI, Bies L, de Witte, Moniek A, Jorritsma A et al. Lethal graft-versus-host disease in mouse models of T cell receptor gene therapy. *Nat Med* 2010; **16**: 565–70, 1p following 570.
- 70 Weiden PL, Storb R, Tsoi MS, Graham TC, Lerner KG, Thomas ED. Infusion of donor lymphocytes into stable canine radiation chimeras: implications for mechanism of transplantation tolerance. *J Immunol* 1976; **116**: 1212–9.
- 71 Kang MH, Park HM. Evaluation of adverse reactions in dogs following intravenous mesenchymal stem cell transplantation. *Acta Vet Scand* 2014; **56**: 16.
- 72 Godown J, Deal AM, Riley K, Bailliard F, Blatt J. Worsening bradycardia following antithymocyte globulin treatment of severe aplastic anemia. *J Pediatr Pharmacol Ther* 2011; **16**: 218–21.
- 73 Hale G, Swirsky DM, Hayhoe FG, Waldmann H. Effects of monoclonal anti-lymphocyte antibodies in vivo in monkeys and humans. *Mol Biol Med* 1983; **1**: 321–34.
- 74 DeMeester TR, Anderson ND, Shaffer CF. The effect of heterologous anti-lymphocyte serum on mouse hemopoietic stem cells. *J Exp Med* 1968; **127**: 731–48.
- 75 Girardet RE, Glass N, Patti J, Gardner B. Comparison between the effect of rabbit anti-rat lymphocyte sera raised by thymus, thoracic duct, and spleen lymphocytes on second-set tumor allograft in the rat. *J Surg Res* 1971; **11**: 433–40.
- 76 Orr WM, Birtch AG, Diethelm AG, Dubernard JM, Duquella J, Glassock RJ. A study of the potential nephrotoxicity of heterologous anti-lymphocyte serum. *Clin Exp Immunol* 1970; **6**: 305–11.
- 77 Gaber AO, Knight RJ, Patel S, Gaber LW. A review of the evidence for use of thymoglobulin induction in renal transplantation. *Transplant Proc* 2010; **42**: 1395–400.
- 78 Gharekhani A, Entezari-Maleki T, Dashti-Khavidaki S, Khalili H. A review on comparing two commonly used rabbit anti-thymocyte globulins as induction therapy in solid organ transplantation. *Expert Opin Biol Ther* 2013; **13**: 1299–313.

- 79 Diethelm AG, Chambers L, Sachs G, Balch CM, Phillips SJ, Thiry C. The preparation and immunosuppressive properties of equine antihuman thymocyte membrane immunoglobulin G. *Surgery* 1979; **85**: 159–65.
- 80 Mathews KA, Gallivan GJ, Mallard BA. Clinical, biochemical, and hematologic evaluation of normal dogs after administration of rabbit anti-dog thymocyte serum. *Vet Surg* 1993; **22**: 213–20.
- 81 Bugelski PJ, Martin PL. Concordance of preclinical and clinical pharmacology and toxicology of therapeutic monoclonal antibodies and fusion proteins: cell surface targets. *Br J Pharmacol* 2012; **166**: 823–46.
- 82 Reff ME, Carner K, Chambers KS, Chinn PC, Leonard JE, Raab R et al. Depletion of B cells in vivo by a chimeric mouse human monoclonal antibody to CD20. *Blood* 1994; **83**: 435–45.
- 83 Jahnke K, Muldoon LL, Varallyay CG, Lewin SJ, Brown RD, Kraemer DF et al. Efficacy and MRI of rituximab and methotrexate treatment in a nude rat model of CNS lymphoma. *Neuro-oncology* 2009; **11**: 503–13.
